# Supplementary material
Source: publisher figshare collection journal article supplement (https://acs.figshare.com/ndownloader/files/4208977)
Supplement: Supplementary file 1 [file 4208977]

**Table S2. Identified AMPs from the skin secretions of *O. wuchuanensis* by**

| <b>Edman degradation</b> |                            |
|--------------------------|----------------------------|
| Name                     | Peak position In Figure S2 |
| Brevinin-2-OW1           | Peak 1 in C1               |
| Nigrocin-OW1             | Peak 2 in C1               |
| Nigrocin-OW2             | Peak 3 in C1               |
| Nigrocin-OW3             | Peak 4 in C1               |
| Odorranain-F-OW2         | Peak 5 in C1               |
| Brevinin-2-OW2           | Peak 2 in C2               |
| Brevinin-2-OW3           | Peak 3 in C2               |
| Nigrocin-OW4             | Peak 6 in C2               |
| Nigrocin-OW5             | Peak 7 in C2               |

The detailed sequences could be checked in Figure.S93.
